# Supplementary material for: Chromatin occupancy and target genes of the haematopoietic master transcription factor MYB
Source: PubMed Central journal article supplement (PMC8076236; doi:10.1038/s41598-021-88516-w), 2021-04-26
Supplement: 41598_2021_88516_MOESM1_ESM.pdf [file 41598_2021_88516_MOESM1_ESM.pdf]

# Supplementary Information

## Chromatin occupancy and target genes of the haematopoietic master transcription factor MYB

Roza B. Lemma<sup>#,1,2</sup>, Marit Ledsaak<sup>#,1,3</sup>, Bettina M. Fuglerud<sup>1,4,5</sup>, Geir Kjetil Sandve<sup>6</sup>, Ragnhild Eskeland<sup>1,3,7</sup> and Odd S. Gabrielsen<sup>1,\*</sup>

<sup>1</sup>Department of Biosciences, University of Oslo, PO Box 1066 Blindern, 0316 Oslo, Norway.

<sup>2</sup>Centre for Molecular Medicine Norway (NCMM), Nordic EMBL Partnership, University of Oslo, 0318 Oslo, Norway.

<sup>3</sup>Institute of Basic Medical Sciences, Department of Molecular Medicine, University of Oslo, PO Box 1112 Blindern, 0317 Oslo, Norway.

<sup>4</sup>Terry Fox Laboratory, BC Cancer, Vancouver, BC V5Z 1L3, Canada.

<sup>5</sup>Department of Medical Genetics, University of British Columbia, Vancouver, BC V6T 1Z4, Canada.

<sup>6</sup>Department of Informatics, PO Box 1080 Blindern, University of Oslo, Oslo, 0371 Norway.

<sup>7</sup>Centre for Cancer Cell Reprogramming, Institute of Clinical Medicine, Faculty of Medicine, University of Oslo, Oslo, Norway.

# These two authors contributed equally to the work.

\*Corresponding author

Email: [o.s.gabrielsen@ibv.uio.no](mailto:o.s.gabrielsen@ibv.uio.no)

Phone: +47 22 85 73 46 (office), +47 415 60 130 (mobile)

## Supplementary Figure S1

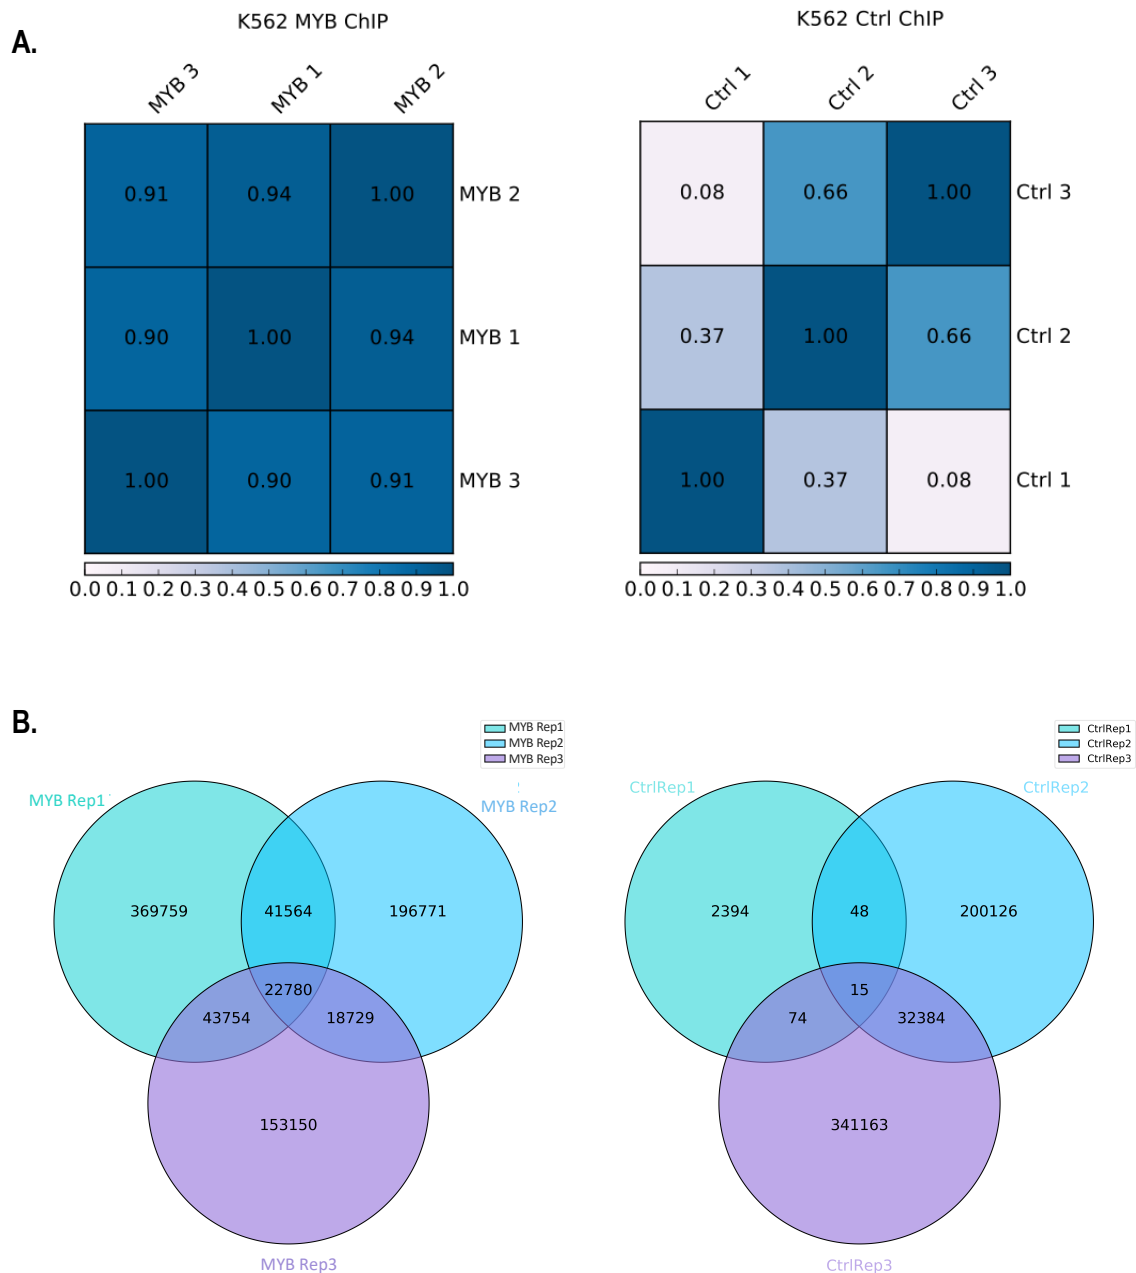

**Supplementary Figure S1. Correlation of MYB ChIP-seq peaks in K562 from three biological replicates.** **A.** Correlation heatmaps showing Pearson correlation of ChIP-seq peaks between three biological replicates from both control K562 cell line (right panel) and K562 cell line stably expressing N-terminally 3×Ty1-tagged full length MYB (left panel). The heatmaps were generated using the plotCorrelation program in deepTools2 v3.3.0 [1]. **B.** Overlap of ChIP-seq derived peaks between three biological replicates obtained from both control K562 cell line (right panel) and K562 cell line stably expressing the N-terminally 3×Ty1-tagged full length MYB (left panel). We used Intervene v0.6.4 [2] to investigate at least 50% physical overlap between the three biological replicates in both control and MYB ChIP-seq data.

# Supplementary Figure S2

**A.**

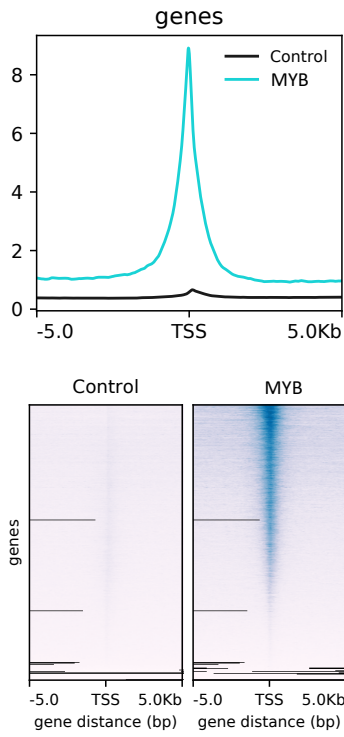

**B.**

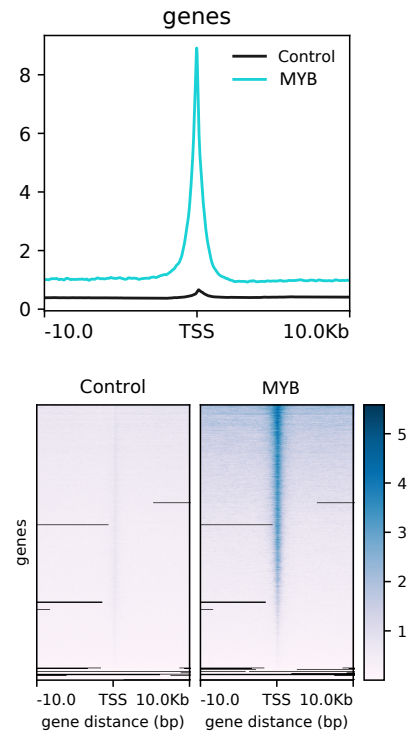

**C.**

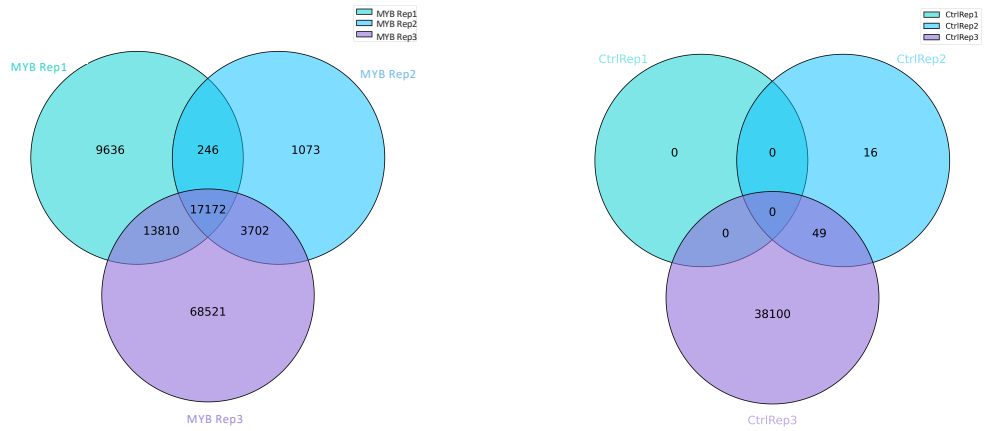

**D.**

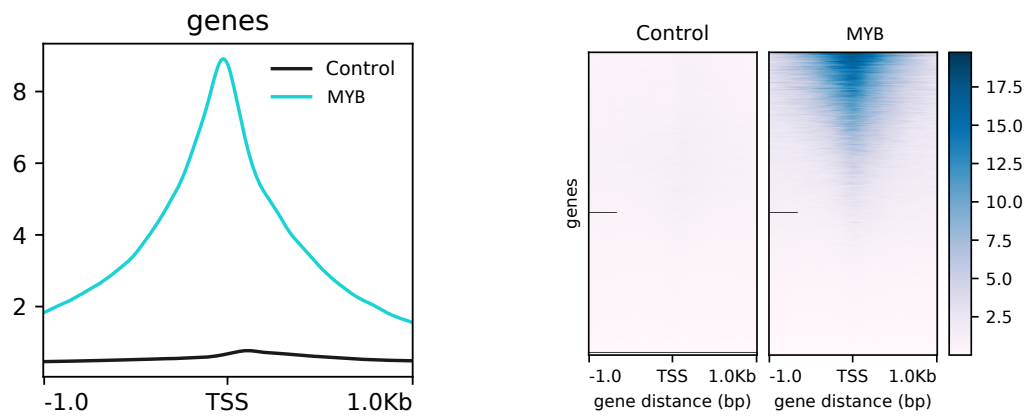

**Supplementary Figure S2. Comparison of average CHIP-seq signals in K562 cells from the control cell line versus the stable cell line expressing N-terminally 3×Ty1-tagged full length MYB.** **A.** A line plot indicating the intensity of MYB CHIP-seq signals at and  $\pm 5$  kb around the TSS of all genes. The heatmap below shows aggregated CHIP-seq signals at and  $\pm 5$  kb around the TSS of all genes. **B.** A line plot indicating the intensity of MYB CHIP-seq signals at and  $\pm 10$  kb around the TSS of all genes. The heatmap below shows aggregated CHIP-seq signals at and  $\pm 10$  kb around the TSS of all genes. We used Ensembl human reference genome annotation (GRCh37 release 87) as regions for calculating the CHIP-seq signal enrichment at and  $\pm 5$  kb as well as  $\pm 10$  kb around the TSSs of all genes. **C.** Overlap of CHIP-seq derived peaks with q-value cut-off  $< 0.005$  between three biological replicates obtained from both control K562 cell line (right panel) and K562 cell line stably expressing the N-terminally 3×Ty1-tagged full length MYB (left panel). We used Intervene v0.6.4 [2] to investigate at least 50% physical overlap between the three biological replicates in both control and MYB CHIP-seq data. This additional CHIP-seq peak calling step was included to demonstrate that the present CHIP-seq data are of very high quality. Even at an extremely stringent cut-off involving a very low q-value in combination with considering only peaks that are consistently present in all three individual biological replicates, we report a large number of high quality MYB CHIP-seq peaks. **D.** Line plot and aggregated heatmap for the same MYB CHIP-seq signals as shown in panel C (Left panel) above. The line plot (right panel) indicates the intensity of the MYB CHIP-seq signals at and  $\pm 1$  kb around the TSS of all genes using the same data. The heatmap shows aggregated CHIP-seq signals at and  $\pm 1$  kb around the TSS of all genes. The line plots and heatmaps were generated using deepTools2 v3.3.0 [1].

## Supplementary Figure S3

### LMO2 with upstream enhancer

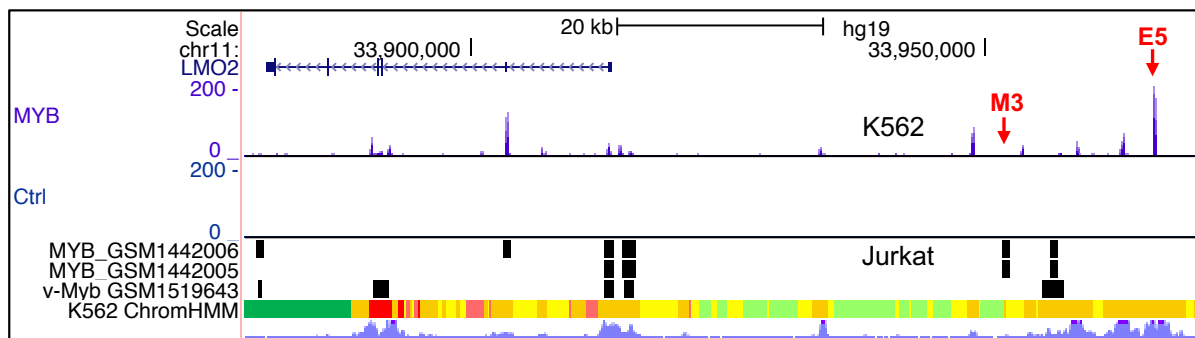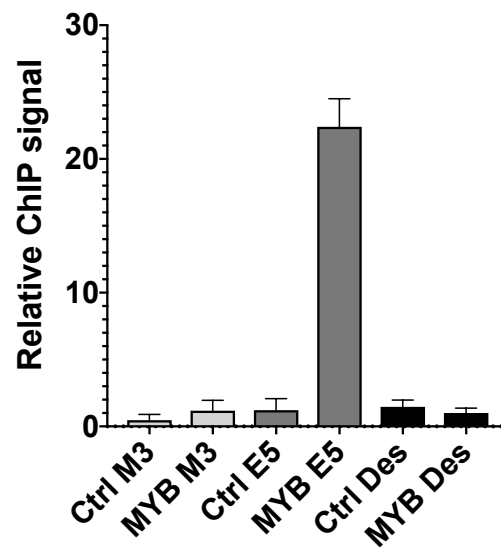

**Supplementary Figure S3. Validation of MYB occupancy at the *LMO2* enhancer using ChIP-qPCR.** As an independent validation assay, selected peaks identified in ChIP-seq were tested by ChIP-qPCR. Chromatin immunoprecipitations were performed with K562 cells stably expressing pEFneo-3×Ty1-MYB (marked MYB) and control pooled cell lines with stable expression of pEF1neo-3×Ty1 (marked Ctrl) as described in the Methods section. Occupancies were analysed by amplifying two specific regions (designated M3 and E5) from the *LMO2* enhancer by quantitative real-time PCR. M3 is a region with a ChIP-signal in Jurkat cells (track GSM1442005 with MYB clone 1-1 antibody Millipore 05-175, track GSM1442006 with MYB antibody Abcam AB45150) [3], but not in K562 cells according to the present ChIP-seq data. The opposite is the case for the E5 region, as illustrated in the upper panel. An unrelated DNA region was used as negative control, a region from a gene desert region (marked Des) [4]. The results are calculated from three biological replicates (each measured with three technical replicates) and are expressed in relative units setting the occupancy of MYB at the gene desert region to 1. The occupancies are given as mean with SEM (lower panel).

## Supplementary Figure S4

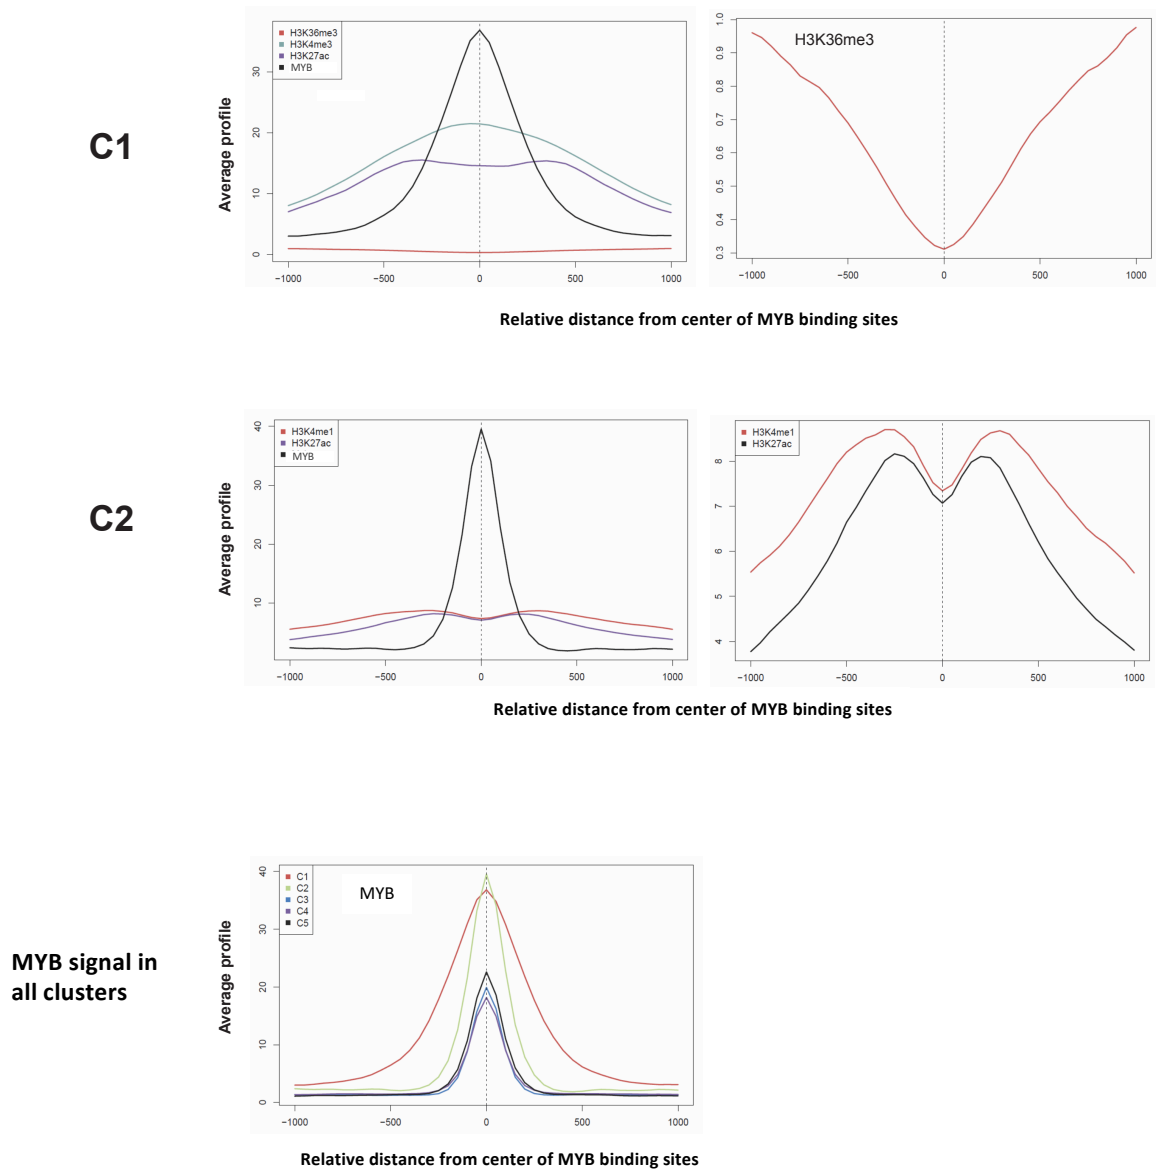

**Supplementary Figure S4. MYB ChIP-seq signals along with signals from K562 histone marks aggregated at the center of MYB binding sites.** Top panel: Average profile plots of H3K36me3, H3K4me3, and H3K27ac ChIP-seq signals within a 2 kb window around the summit of MYB bound regions in cluster C1 (left). The H3K36me3 signals are highlighted in the right panel (note the difference in y-axis scale). Middle panel: Average profile plots of H3K4me1 and H3K27ac ChIP-seq signals within a 2 kb window around the summit of MYB bound regions in cluster C2 (left). H3K4me1 and H3K27ac signals without MYB ChIP-seq signals are highlighted in the right panel. Bottom panel: Average profile plot of MYB ChIP-seq signals within a 2 kb window around the summits of MYB bound regions in each cluster C1-C5 from Fig. 3.

# Supplementary Figure S5

A.

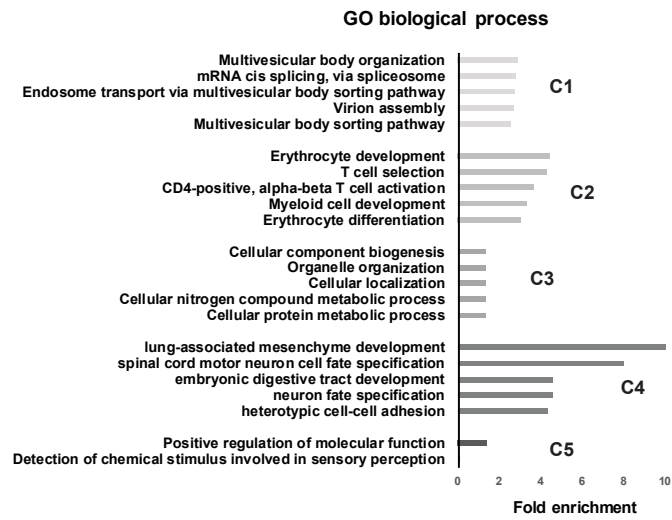

B.

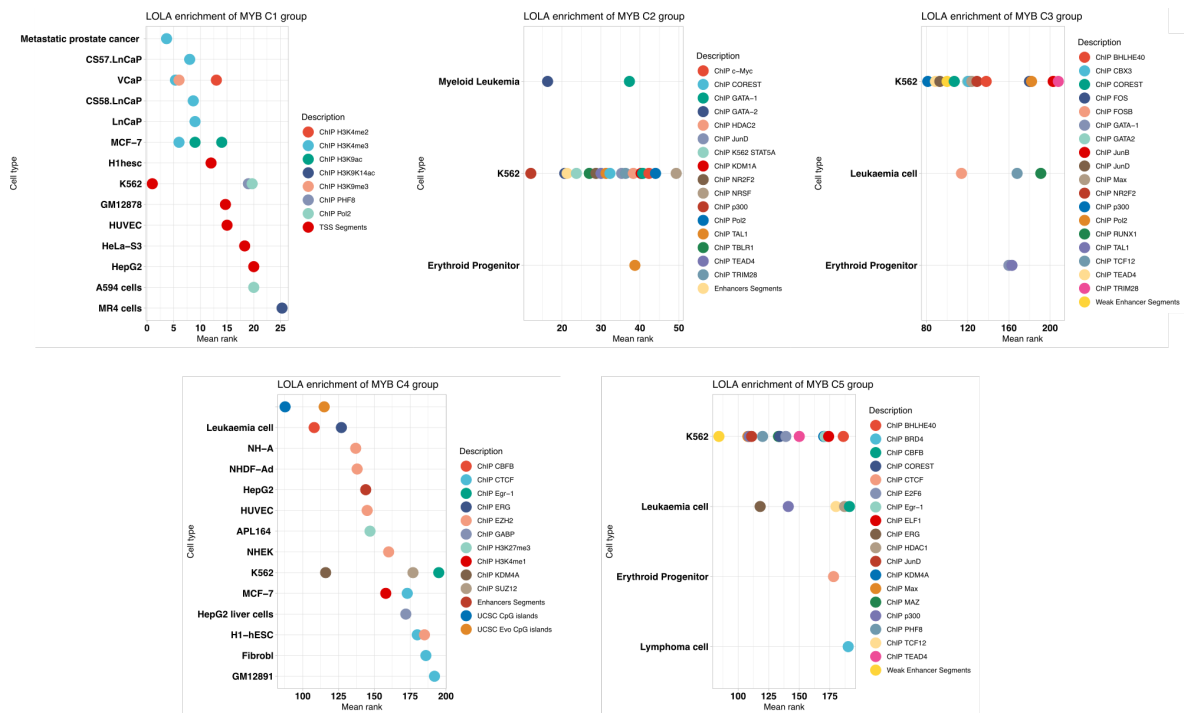

**Supplementary Figure S5. Enrichment analysis of the C-groups.** A. Top five enriched (or the only enriched for C5) biological processes for genes associated with MYB bound regions in each cluster C1-C5. GO-term enrichment was analysed using PANTHER v11 [5]. B. Enrichment of MYB occupied regions for the individual C-groups. We employed the LOLAweb regions enrichment analysis tool to compare the present genomic MYB profiles with other epigenetic profiles in the public domain. In each C-group, the enrichment of MYB occupied regions to a set of regions from publicly available genomic datasets accessed through the LOLAcore database, are ranked according to their similarity score [6].

## Supplementary Figure S6

A.

| Motif for cluster C3                                                              | Name  | P-value            | % of target seq with motif | % of background seq with motif |
|-----------------------------------------------------------------------------------|-------|--------------------|----------------------------|--------------------------------|
|  | A-MYB | 1e <sup>-511</sup> | 49.19%                     | 15.45%                         |
|  | B-MYB | 1e <sup>-486</sup> | 45.11%                     | 13.46%                         |
|  | MYB   | 1e <sup>-476</sup> | 50.33%                     | 17.06%                         |
|  | Fra1  | 1e <sup>-109</sup> | 13.68%                     | 4.45%                          |
|  | c-Jun | 1e <sup>-107</sup> | 9.54%                      | 2.32%                          |
|  | ATF3  | 1e <sup>-106</sup> | 15.43%                     | 5.54%                          |
|  | FOSL2 | 1e <sup>-104</sup> | 11.13%                     | 3.15%                          |
|  | BATF  | 1e <sup>-102</sup> | 14.97%                     | 5.36%                          |
|  | PU.1  | 1e <sup>-87</sup>  | 16.99%                     | 6.68%                          |
|  | GATA4 | 1e <sup>-60</sup>  | 13.78%                     | 5.99%                          |

B.

| Motif for cluster C4                                                                | Name  | P-value            | % of target seq with motif | % of background seq with motif |
|-------------------------------------------------------------------------------------|-------|--------------------|----------------------------|--------------------------------|
|  | B-MYB | 1e <sup>-776</sup> | 47.95%                     | 13.64%                         |
|  | A-MYB | 1e <sup>-765</sup> | 51.50%                     | 16.04%                         |
|  | MYB   | 1e <sup>-726</sup> | 53.44%                     | 18.02%                         |
|  | Fra1  | 1e <sup>-191</sup> | 14.70%                     | 4.28%                          |
|  | BATF  | 1e <sup>-181</sup> | 15.71%                     | 5.02%                          |
|  | ATF3  | 1e <sup>-179</sup> | 16.03%                     | 5.23%                          |
|  | FOSL2 | 1e <sup>-169</sup> | 11.68%                     | 3.09%                          |
|  | PU.1  | 1e <sup>-164</sup> | 17.23%                     | 6.26%                          |
|  | C-Jun | 1e <sup>-94</sup>  | 9.74%                      | 2.23%                          |
|  | GATA4 | 1e <sup>-85</sup>  | 13.29%                     | 5.63%                          |

**Supplementary Figure S6. Enrichments of known motifs at MYB occupied regions in cluster C3 and C4.** Enrichments of known motifs at MYB occupied regions in cluster C3 (panel A) and cluster C4 (Panel B) from Fig. 3A. Enriched binding motifs are arranged in descending order based on their p-value. Motif analyses around MYB binding sites in the C-groups were made using the HOMER program [7].



## Supplementary Figure S7

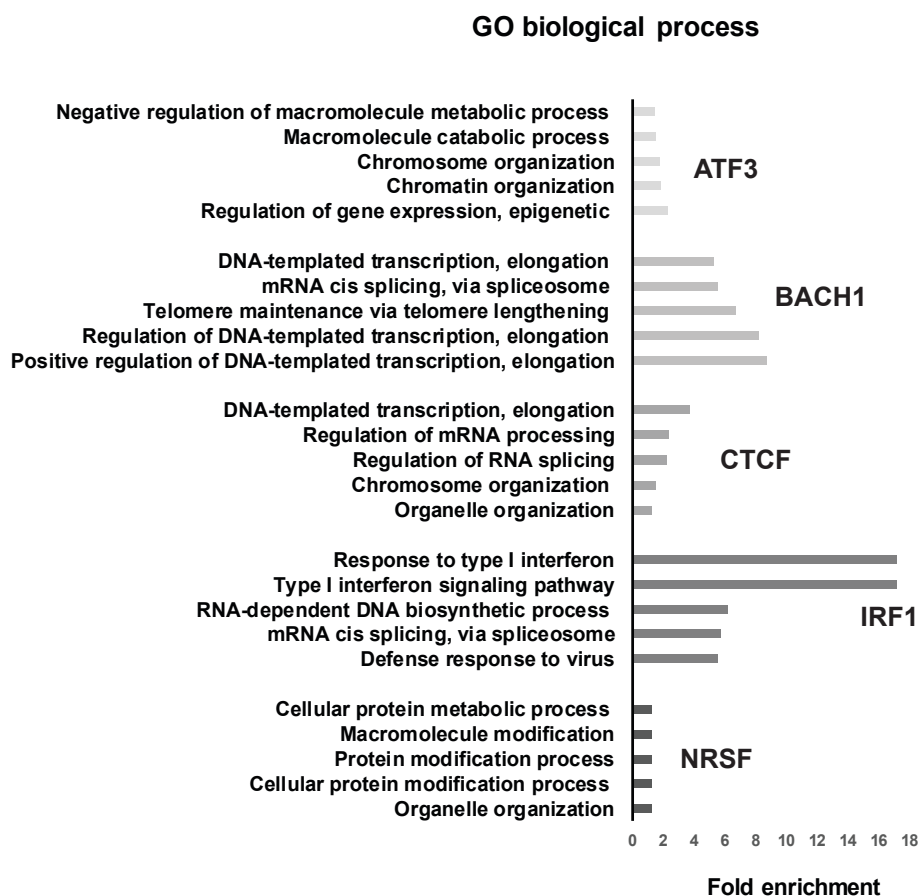

**Supplementary Figure S7. Top enriched biological processes for genes associated with regions co-occupied by MYB and the top five co-localizing TF.** Regions co-occupied by MYB and each of the top five co-localizing TFs shown in Fig.6 were identified by employing bedtools intersect (version 2.17.0) [8] on the corresponding pairs of the ChIP-seq peaks. The co-occupied regions were then associated with target genes using STITCHIT [9]. The STITCHIT associated genes were used to perform the GO-term analysis using PANTHER v11 [5].

## Supplementary Figure S8

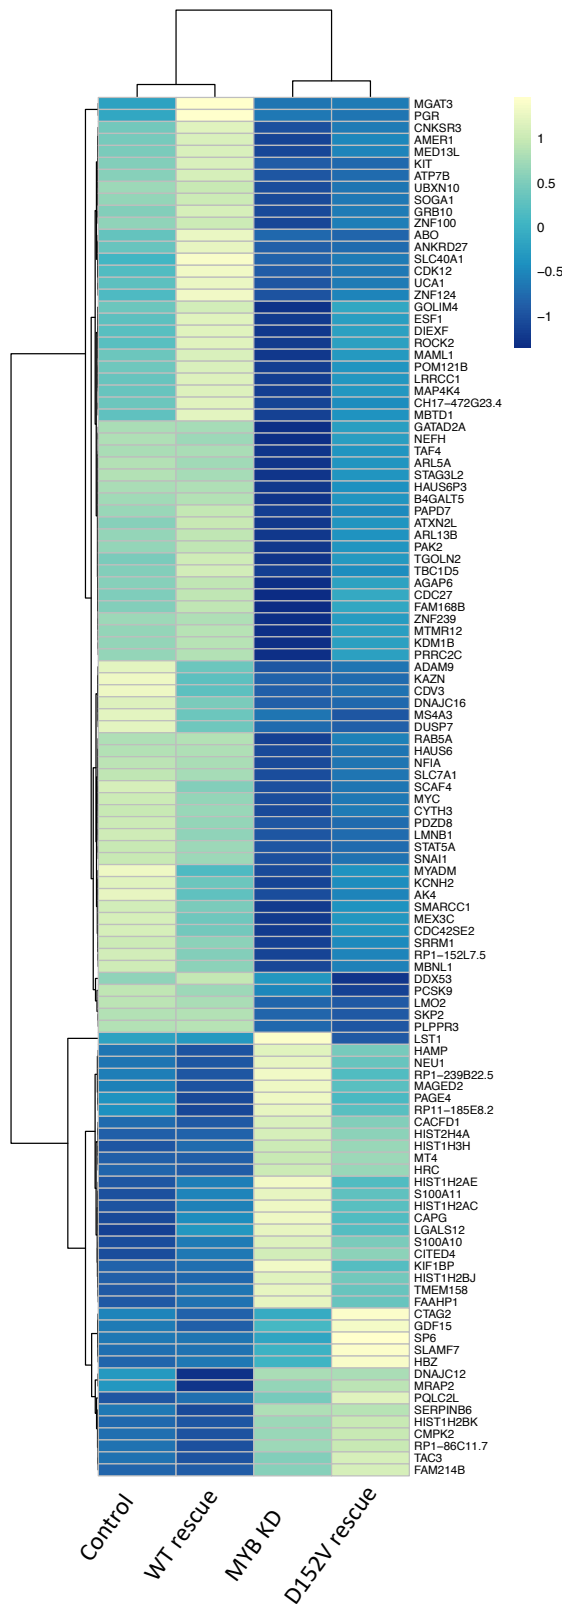

**Supplementary Figure S8. Expression profiles of MYB responsive pioneer target genes.** Hierarchical clustering of pioneer target genes of MYB (n=115) identified from the previously reported K562 RNA-seq data from our lab (GEO accession: GSE85187). The expressions of these pioneer target genes are affected in the endogenous MYB knockdown (KD) set and rescued by ectopic expression of wild-type (WT) MYB, whereas the pioneer function-deficient mutant, D152V MYB is unable to rescue the expression patterns. The cluster heatmap was generated using the ClustVis web tool [10]. Each row represents a single pioneer target gene [11].

## Supplementary Figure S9

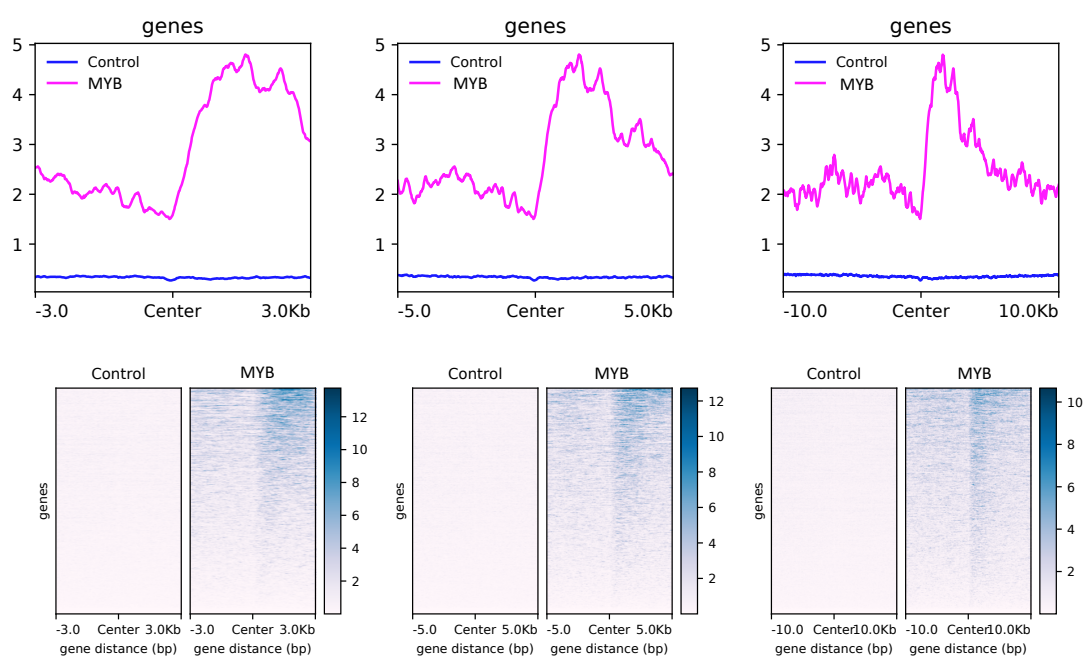

**Supplementary Figure S9. MYB ChIP-seq signals around the K562 super enhancer (SE) elements.** The MYB ChIP-seq signals at and  $\pm$  3 kb, 5 kb and 10 kb around the centre of K562 SE elements reported by Qian et al. [12] are shown. The line plots indicate the intensity of the MYB ChIP-seq signals at and surrounding the indicated genomic positions. The heatmaps show the ChIP-seq signals in the indicated genomic positions. The line plots and heatmaps were generated using deepTools2 v3.3.0 [1].

## Supplementary Figure S10

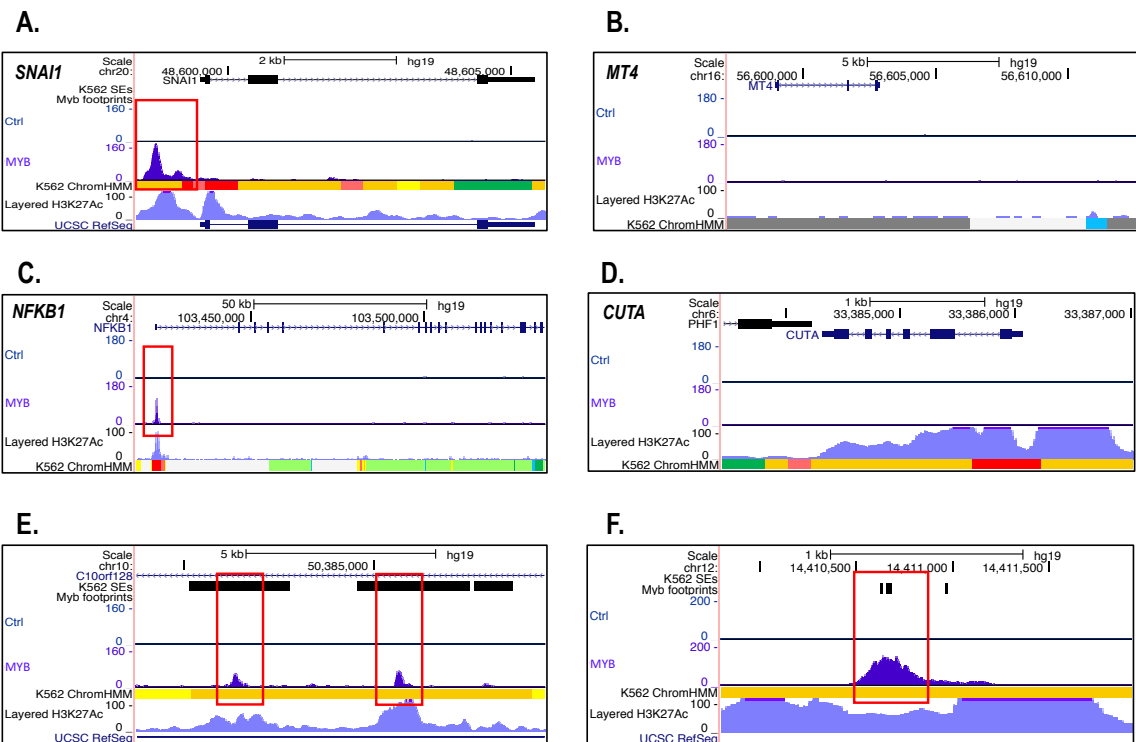

**Supplementary Figure S10. Example tracks corresponding to the overlapping and non-overlapping regions reported on Fig.7.** **A.** MYB occupancy at the promoter of the *SNAI2* locus illustrating an example of a direct pioneer target gene of MYB taken from the set reported in Fig. 7A (n=102). **B.** An example of an indirect pioneer target gene of MYB, *MT4*, taken from the set reported in Fig. 7A (n=13). A UCSC track at this locus illustrates the absence of MYB occupancy at this region. **C.** An example of direct non-pioneer target gene of MYB, *NFKB1*, taken from the set reported in Fig.7B (n=423). A UCSC track shows the occupancy of MYB at the TSS of *NFKB1*. **D.** An example of indirect non-pioneer target gene of MYB, *CUTA*, taken from the set reported in Fig.7B (n=430). A UCSC track at this locus illustrates the absence of MYB occupancy at this region. **E.** An example of the overlap between MYB occupied regions and Super-enhancer elements taken from the list in Fig.7D. **F.** An example of the overlap between MYB occupied regions and MYB footprint taken from the set reported in Fig.7C. Visualization of the tracks were made using the UCSC genome browser [13].

# Supplementary Figure S11

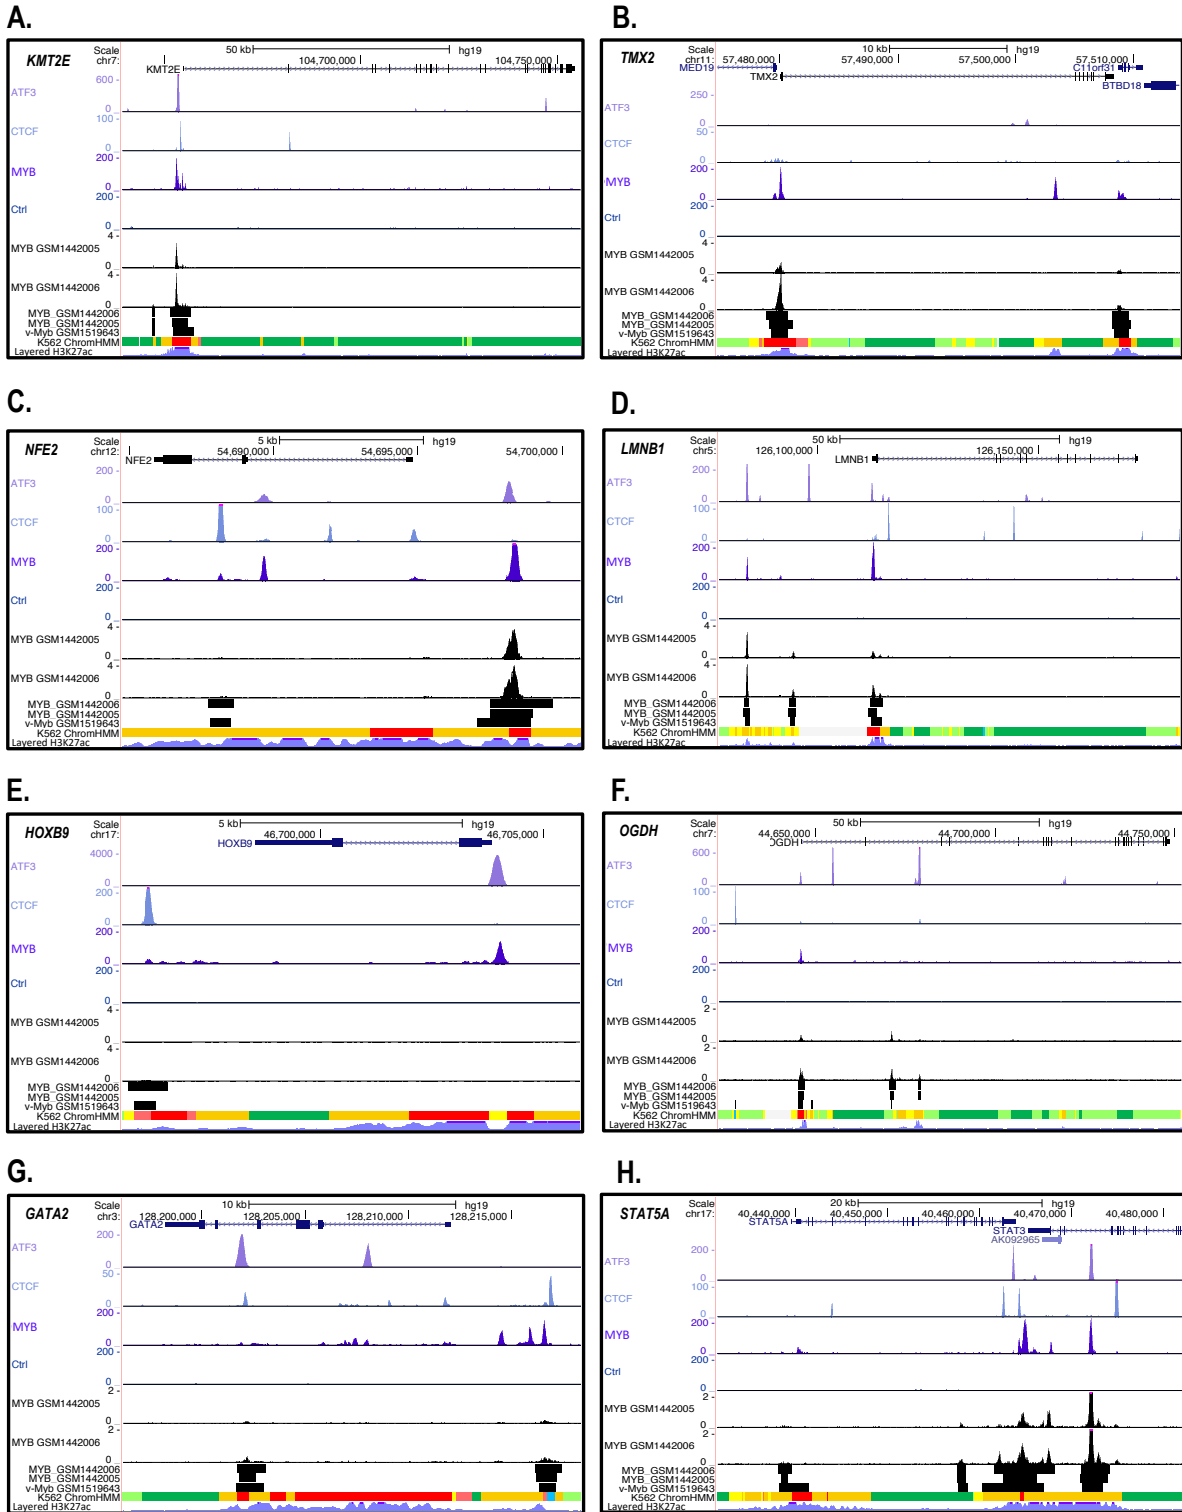

**Supplementary Figure S11. Example tracks highlighting co-occupancy of MYB with the top two co-localizing factors (ATF3 and CTCF).** In addition, publicly available ChIP-seq tracks for MYB in Jurkat cells (track GSM1442005 with MYB clone 1-1 antibody Millipore 05-175, track GSM1442006 with MYB antibody Abcam AB45150) and in MOLT3 cells (track GSM1519643 with MYB antibody Abcam ab45150) are added for some of the MYB target genes reported in Fig.1C, Fig.4C and Fig.8. **A.** MYB, ATF3, CTCF, Jurkat MYB and MOLT3 MYB ChIP-seq peak co-occupancy at the *KMT2E* locus **B.** MYB, CTCF, Jurkat MYB and MOLT3 MYB ChIP-seq peak co-occupancy at the *TMX2* locus. **C.** MYB, ATF3,

Jurkat MYB and MOLT3 MYB CHIP-seq peak co-occupancy at the *NFE2* locus. **D.** MYB, ATF3, Jurkat MYB and MOLT3 MYB CHIP-seq peak co-occupancy at the *LMNB1* locus **E.** MYB, ATF3 and CTCF co-occupancy at *HOXB9* locus. **F.** MYB, ATF3, Jurkat MYB and MOLT3 MYB CHIP-seq peak co-occupancy at the *OGDH* locus. **G.** MYB, CTCF, Jurkat MYB and MOLT3 MYB CHIP-seq peak co-occupancy at the *GATA2* locus. **H.** MYB, CTCF, Jurkat MYB and MOLT3 MYB CHIP-seq peak co-occupancy at the *STAT5A* locus. The Jurkat MYB and MOLT3 MYB CHIP-seq data are obtained from Mansour et al. [3]. The GEO accessions for CHIP-seq data obtained from Mansour et al. are displayed as track names on the UCSC genome browser. Visualization of the tracks were made using the UCSC genome browser [13].

**Supplementary table S1.** K562 publicly available ChIP-seq data collected from ENCODE [14, 15] used in the current study.

| Public K562 ChIP-seq data | ENCODE-DCC accessions                            |
|---------------------------|--------------------------------------------------|
| E2F1                      | ENCFF998YJY                                      |
| CTCF                      | ENCFF962FQM                                      |
| CTCF                      | ENCFF738TKN                                      |
| BACH1                     | ENCFF319BCP                                      |
| POLR2A                    | ENCFF947KPB                                      |
| RCOR1                     | ENCFF484CKD                                      |
| ZMIZ1                     | ENCFF597DIY                                      |
| HCFC1                     | ENCFF474NLG                                      |
| SIX5                      | wgEncodeAwgTfbsHaibK562Six5Pcr1xUniPk            |
| TBP                       | ENCFF380FJL                                      |
| TAF7                      | wgEncodeAwgTfbsHaibK562Taf7sc101167V0416101UniPk |
| GATA1                     | wgEncodeAwgTfbsSydhK562Gata1UcdUniPk             |
| STAT2                     | wgEncodeAwgTfbsSydhK562Stat2Ifna30UniPk          |
| THAP1                     | wgEncodeAwgTfbsHaibK562Thap1sc98174V0416101UniPk |
| FOSL1                     | wgEncodeAwgTfbsHaibK562Fosl1sc183V0416101UniPk   |
| c-Fos                     | wgEncodeSydhTfbsK562CfosStdPk                    |
| HDAC2                     | wgEncodeAwgTfbsHaibK562Gata2sc267Pcr1xUniPk      |
| SETDB1                    | wgEncodeSydhTfbsK562Setdb1UcdPk                  |
| BCLAF1                    | wgEncodeAwgTfbsHaibK562Bclaf101388Pcr1xUniPk     |
| NFYA                      | wgEncodeSydhTfbsK562NfyaStdPk                    |
| HMG3                      | ENCFF002CWT                                      |
| c-Jun                     | cgEncodeSydhTfbsK562CjunStdPk                    |
| SP1                       | ENCFF300XUA                                      |
| NRF1                      | ENCFF992QZV                                      |
| STAT5A                    | ENCFF696KPD                                      |
| NRSF(REST)                | ENCFF895QLA                                      |
| ATF1                      | ENCFF030HWZ                                      |
| GATA2                     | wgEncodeAwgTfbsHaibK562Gata2sc267Pcr1xUniPk      |
| TBLR1                     | wgEncodeAwgTfbsSydhK562Tblr1nb600270lgrabUniPk   |
| ATF3                      | ENCFF958KNK                                      |
| CHD1                      | wgEncodeAwgTfbsBroadK562Chd1a301218aUniPk        |
| CCNT2                     | ENCFF002CVU                                      |
| TRIM28                    | ENCFF164HLQ                                      |
| Sin3Ak-20                 | wgEncodeAwgTfbsHaibK562Sin3ak20V0416101UniPk     |
| NR2F2                     | ENCFF255EOB                                      |
| ETS1                      | ENCFF076YZO                                      |

|         |                                              |
|---------|----------------------------------------------|
| SAP30   | wgEncodeAwgTfbsBroadK562Sap3039731UniPk      |
| GABP    | wgEncodeAwgTfbsHaibK562GabbV0416101UniPk     |
| GTF2B   | ENCFF002CWR                                  |
| CBX3    | ENCFF455TDM                                  |
| p300    | ENCFF549TYR                                  |
| YY1     | ENCFF557DSM                                  |
| UBTF    | ENCFF671DOL                                  |
| ELF1    | ENCFF526EEI                                  |
| HDAC1   | ENCFF996CUX                                  |
| EGR1    | ENCFF004WYV                                  |
| ELK1    | ENCFF019PEL                                  |
| TAF1-   | ENCFF822FWM                                  |
| ZBTB7A  | ENCFF706ISJ                                  |
| PML     | ENCFF881QBT                                  |
| JunD    | ENCFF337DKJ                                  |
| PLU1    | ENCFF368TYM                                  |
| ZC3H11A | ENCFF522JRK                                  |
| MAX     | ENCFF422NGZ                                  |
| RBBP5   | ENCFF379MPS                                  |
| GTF2F1  | ENCFF988FFD                                  |
| IRF1    | ENCFF388AJH                                  |
| MAZ     | wgEncodeAwgTfbsSydhK562Mazab85725lggrabUniPk |
| MXI1    | ENCFF970LCB                                  |
| PHF8    | ENCFF626KTJ                                  |
| CHD2    | wgEncodeSydhTfbsK562Chd2ab68301lggrabPk      |
| E2F6    | GSM935597                                    |
| TBLXR1  | ENCFF048OBR                                  |
| SPI1    | ENCFF002CMJ                                  |
| NFE2    | ENCFF495MHZ                                  |



## References

1. Ramirez, F., D.P. Ryan, B. Gruning, V. Bhardwaj, F. Kilpert, A.S. Richter, S. Heyne, F. Dundar, and T. Manke, *deepTools2: a next generation web server for deep-sequencing data analysis*. *Nucleic Acids Res*, 2016. **44**(W1): p. W160-5.
2. Khan, A. and A. Mathelier, *Intervene: a tool for intersection and visualization of multiple gene or genomic region sets*. *BMC Bioinformatics*, 2017. **18**(1): p. 287.
3. Mansour, M.R., B.J. Abraham, L. Anders, A. Berezhovskaya, A. Gutierrez, A.D. Durbin, J. Etchin, L. Lawton, S.E. Sallan, L.B. Silverman, M.L. Loh, S.P. Hunger, T. Sanda, R.A. Young, and A.T. Look, *Oncogene regulation. An oncogenic super-enhancer formed through somatic mutation of a noncoding intergenic element*. *Science*, 2014. **346**(6215): p. 1373-7.
4. Barski, A., S. Cuddapah, K. Cui, T.Y. Roh, D.E. Schones, Z. Wang, G. Wei, I. Chepelev, and K. Zhao, *High-resolution profiling of histone methylations in the human genome*. *Cell*, 2007. **129**(4): p. 823-37.
5. Mi, H., X. Huang, A. Muruganujan, H. Tang, C. Mills, D. Kang, and P.D. Thomas, *PANTHER version 11: expanded annotation data from Gene Ontology and Reactome pathways, and data analysis tool enhancements*. *Nucleic Acids Res*, 2017. **45**(D1): p. D183-D189.
6. Nagraj, V.P., N.E. Magee, and N.C. Sheffield, *LOLAweb: a containerized web server for interactive genomic locus overlap enrichment analysis*. *Nucleic Acids Res*, 2018. **46**(W1): p. W194-W199.
7. Heinz, S., C. Benner, N. Spann, E. Bertolino, Y.C. Lin, P. Laslo, J.X. Cheng, C. Murre, H. Singh, and C.K. Glass, *Simple combinations of lineage-determining transcription factors prime cis-regulatory elements required for macrophage and B cell identities*. *Mol Cell*, 2010. **38**(4): p. 576-89.
8. Quinlan, A.R. and I.M. Hall, *BEDTools: a flexible suite of utilities for comparing genomic features*. *Bioinformatics*, 2010. **26**(6): p. 841-2.
9. Schmidt, F., A. Marx, M. Hebel, M. Wegner, N. Baumgarten, M. Kaulich, J. Göke, J. Vreeken, and M.H. Schulz, *Integrative analysis of epigenetics data identifies gene-specific regulatory elements*. *bioRxiv*, 2019: p. 585125.
10. Metsalu, T. and J. Vilo, *ClustVis: a web tool for visualizing clustering of multivariate data using Principal Component Analysis and heatmap*. *Nucleic Acids Res*, 2015. **43**(W1): p. W566-70.
11. Fuglerud, B.M., R.B. Lemma, P. Wanichawan, A.Y.M. Sundaram, R. Eskeland, and O.S. Gabrielsen, *A c-Myb mutant causes deregulated differentiation due to impaired histone binding and abrogated pioneer factor function*. *Nucleic Acids Res*, 2017. **45**(13): p. 7681-7696.
12. Qian, F.C., X.C. Li, J.C. Guo, J.M. Zhao, Y.Y. Li, Z.D. Tang, L.W. Zhou, J. Zhang, X.F. Bai, Y. Jiang, Q. Pan, Q.Y. Wang, E.M. Li, C.Q. Li, L.Y. Xu, and D.C. Lin, *SEanalysis: a web tool for super-enhancer associated regulatory analysis*. *Nucleic Acids Res*, 2019. **47**(W1): p. W248-W255.
13. Kent, W.J., C.W. Sugnet, T.S. Furey, K.M. Roskin, T.H. Pringle, A.M. Zahler, and D. Haussler, *The human genome browser at UCSC*. *Genome Res*, 2002. **12**(6): p. 996-1006.
14. Consortium, E.P., *An integrated encyclopedia of DNA elements in the human genome*. *Nature*, 2012. **489**(7414): p. 57-74.

15. Davis, C.A., B.C. Hitz, C.A. Sloan, E.T. Chan, J.M. Davidson, I. Gabdank, J.A. Hilton, K. Jain, U.K. Baymuradov, A.K. Narayanan, K.C. Onate, K. Graham, S.R. Miyasato, T.R. Dreszer, J.S. Strattan, O. Jolanki, F.Y. Tanaka, and J.M. Cherry, *The Encyclopedia of DNA elements (ENCODE): data portal update*. *Nucleic Acids Res*, 2018. **46**(D1): p. D794-D801.
